# Supplementary material
Source: Elsevier journal article supplement (https://www.sciencedirect.com/science/article/pii/S2603647919300260)
Supplement: mmc1 [file S2603647919300260:mmc1.docx]

**Attachment A. Research strategy**

**Medline (PubMed)**

((((defensive medicine[MeSH Terms]) OR "defensive practice") OR "defensive practices") OR "defensive work") AND (((((((((((((((((midwifery[MeSH Terms]) OR nurses[MeSH Terms]) OR physical therapist[MeSH Terms]) OR Case Managers[MeSH Terms]) OR audiologist[MeSH Terms]) OR Medical Laboratory Personnel[MeSH Terms]) OR nursing staff[MeSH Terms]) OR Nutritionists[MeSH Terms]) OR Occupational Therapists[MeSH Terms]) OR Optometrists[MeSH Terms]) OR Operating Room Technicians[MeSH Terms]) OR Physical Therapist Assistants[MeSH Terms]) OR Emergency Medical Technicians[MeSH Terms]) OR Dental Auxiliaries[MeSH Terms]) OR Nurses' Aides[MeSH Terms]) OR Home Health Aides[MeSH Terms]) OR Physician Assistants[MeSH Terms])

**Embase**

#1 'defensive practice' OR 'defensive practices' OR 'defensive medicine'/exp OR 'defensive medicine' OR 'defensive work'

#2 'paramedical personnel'/exp OR 'paramedical personnel' OR 'optometrist'/exp OR 'optometrist' OR 'dental auxiliary'/exp OR 'dental auxiliary' OR 'dental staff'/exp OR 'dental staff' OR 'health auxiliary'/exp OR 'health auxiliary' OR 'nursing home personnel'/exp OR 'nursing home personnel' OR 'nursing home'/exp

#1 AND #2

**CINAHL**

#1 defensive medicine

#2 defensive strategies

#3 defensive practice

#4 defensive practices

#5 #1 OR #2 OR #3 OR #4

#6 (MH "Allied Health Personnel+") OR (MH "Case Managers") OR (MH "Expert Nurses") OR (MH "Home Health Aides") OR (MH "Psychiatric Technicians") OR (MH "Midwives+") OR (MH "Nurses+") OR (MH "Nursing Assistants") OR (MH "Nursing Home Personnel") OR (MH "Surgical Technologists") OR (MH "Nurse Anesthetists") OR (MH "Nursing Staff, Hospital")

#7 #5 AND #6

**Cochrane Library**

#1 "defensive practice":ti,ab,kw

#2 "defensive medicine":ti,ab,kw

#3 #1 OR #2

#4 MeSH descriptor: [Nursing, Practical] explode all trees

#5 MeSH descriptor: [Allied Health Occupations] explode all trees

#6 #4 OR #5

#7 #3 AND #6
